# Supplementary material for: Levels of Polychlorinated Dibenzo-p-Dioxins/Furans (PCDD/Fs) and Dioxin-Like Polychlorinated Biphenyls (DL-PCBs) in Human Breast Milk in Chile: A Pilot Study
Source: MDPI journal article supplement (doi:10.3390/ijerph18094825), 2021-04-30
Supplement: s1 [file s1]

## Supplementary Material

**Table S1.** Informed Detection Limit (DL) of the method and the percentage of recovery of each congener of dioxin-like polychlorinated biphenyls (DL-PCBs), polychlorinated dibenzodioxins (PCDD) and polychlorinated dibenzofurans (PCDF) analyzed (Laboratory of Veterinary Pharmacology of Universidad de Chile). The equivalent toxic concentrations (WHO-TEQ) values were calculated based on WHO Toxic Equivalency Factors (TEF) (2005) and the levels found (pg/g) in the breast milk samples.

| Congener name       | TEF<br>WHO<br>2005 |          | Arica |        |          |          | Coltauco |        |          |          | Molina |        |          |  |
|---------------------|--------------------|----------|-------|--------|----------|----------|----------|--------|----------|----------|--------|--------|----------|--|
|                     | Level              | %        | DL    | pg TEQ | Level    | %        | DL       | pg TEQ | Level    | %        | DL     | pg TEQ |          |  |
|                     | pg/g               | Recovery | pg/g  | WHO/g  | pg/g     | Recovery | pg/g     | WHO/g  | pg/g     | Recovery | pg/g   | WHO/g  |          |  |
| Furans              |                    |          |       |        |          |          |          |        |          |          |        |        |          |  |
| 2,3,7,8-TCDF        | 0.1                | 0.021    | 53    | 0.006  | 0.002    | 0.006    | 55       | 0.002  | 0.0006   | 0.007    | 45     | 0.002  | 0.0007   |  |
| 1,2,3,7,8-PeCDF     | 0.03               | 0.033    | 58    | 0.008  | 0.001    | 0.015    | 69       | 0.003  | 0.0005   | 0.016    | 59     | 0.004  | 0.0005   |  |
| 2,3,4,7,8-PeCDF     | 0.3                | 0.087    | 63    | 0.007  | 0.03     | 0.138    | 73       | 0.002  | 0.04     | 0.098    | 62     | 0.004  | 0.03     |  |
| 1,2,3,4,7,8-HxCDF   | 0.1                | 0.048    | 55    | 0.004  | 0.005    | 0.053    | 58       | 0.002  | 0.005    | 0.055    | 35     | 0.004  | 0.006    |  |
| 1,2,3,6,7,8-HxCDF   | 0.1                | 0.042    | 58    | 0.004  | 0.004    | 0.055    | 58       | 0.002  | 0.006    | 0.056    | 35     | 0.004  | 0.006    |  |
| 2,3,4,6,7,8-HxCDF   | 0.1                | 0.015    | 57    | 0.004  | 0.002    | 0.025    | 57       | 0.002  | 0.003    | 0.026    | 35     | 0.004  | 0.003    |  |
| 1,2,3,7,8,9-HxCDF   | 0.1                | 0.028    | 49    | 0.006  | 0.003    | 0.003    | 64       | 0.002  | 0.0003   | 0.005    | 42     | 0.004  | 0.0005   |  |
| 1,2,3,4,6,7,8-HpCDF | 0.01               | 0.017    | 53    | 0.003  | 0.0002   | 0.028    | 60       | 0.001  | 0.0003   | 0.04     | 39     | 0.001  | 0.0004   |  |
| 1,2,3,4,7,8,9-HpCDF | 0.01               | ND       | 49    | 0.006  | 0.00003  | 0.002    | 62       | 0.002  | 0.00002  | 0.004    | 42     | 0.002  | 0.00004  |  |
| OCDF                | 0.0003             | ND       | 52    | 0.009  | 0.000001 | ND       | 52       | 0.003  | 0.000005 | ND       | 37     | 0.003  | 0.000005 |  |

|                     |         |        |    |       |          |        |    |       |         |        |    |       |          |
|---------------------|---------|--------|----|-------|----------|--------|----|-------|---------|--------|----|-------|----------|
| <b>Dioxins</b>      |         |        |    |       |          |        |    |       |         |        |    |       |          |
| 2,3,7,8-TCDD        | 1       | ND     | 70 | 0.005 | 0.003    | 0.014  | 72 | 0.002 | 0.01    | 0.005  | 51 | 0.002 | 0.005    |
| 1,2,3,7,8-PeCDD     | 1       | 0.038  | 67 | 0.006 | 0.04     | 0.054  | 72 | 0.003 | 0.05    | 0.045  | 60 | 0.003 | 0.05     |
| 1,2,3,4,7,8-HxCDD   | 0.1     | 0.026  | 54 | 0.005 | 0.003    | 0.036  | 53 | 0.002 | 0.004   | 0.03   | 32 | 0.002 | 0.003    |
| 1,2,3,6,7,8-HxCDD   | 0.1     | 0.095  | 57 | 0.005 | 0.01     | 0.074  | 57 | 0.002 | 0.007   | 0.107  | 36 | 0.002 | 0.01     |
| 1,2,3,7,8,9-HxCDD   | 0.1     | 0.016  | 56 | 0.005 | 0.002    | 0.018  | 55 | 0.002 | 0.002   | 0.033  | 34 | 0.003 | 0.003    |
| 1,2,3,4,6,7,8-HpCDD | 0.01    | 0.077  | 56 | 0.004 | 0.0008   | 0.076  | 57 | 0.002 | 0.0008  | 0.123  | 37 | 0.002 | 0.001    |
| OCDD                | 0.0003  | 0.281  | 52 | 0.011 | 0.00008  | 0.251  | 52 | 0.003 | 0.00008 | 0.55   | 37 | 0.003 | 0.0002   |
| <b>PCBs</b>         |         |        |    |       |          |        |    |       |         |        |    |       |          |
| PCB 81              | 0.0003  | ND     | 30 | 0.048 | 0.00001  | ND     | 62 | 0.07  | 1       | ND     | 48 | 0.069 | 0.00001  |
| PCB 77              | 0.0001  | ND     | 28 | 0.057 | 0.000003 | ND     | 66 | 0.065 | 3       | ND     | 52 | 0.067 | 0.000003 |
| PCB 123             | 0.00003 | 0.265  | 36 | 0.039 | 0.00001  | 0.602  | 49 | 0.05  | 2       | 0.615  | 40 | 0.069 | 0.00002  |
| PCB 118             | 0.00003 | 21.784 | 34 | 0.040 | 0.0007   | 35.142 | 44 | 0.052 | 1       | 36.936 | 39 | 0.068 | 0.001    |
| PCB 114             | 0.00003 | 1.135  | 35 | 0.043 | 0.00004  | 1.685  | 49 | 0.049 | 5       | 1.904  | 43 | 0.062 | 0.000060 |
| PCB 105             | 0.00003 | 5.985  | 36 | 0.032 | 0.0002   | 5.413  | 33 | 0.043 | 2       | 5.293  | 28 | 0.071 | 0.0002   |
| PCB 126             | 0.1     | 0.173  | 29 | 0.04  | 0.02     | 0.168  | 30 | 0.05  | 0.02    | 0.154  | 25 | 0.085 | 0.02     |
| PCB 167             | 0.00003 | 2.561  | 38 | 0.028 | 0.00001  | 3.89   | 50 | 0.043 | 1       | 3.923  | 41 | 0.067 | 0.001    |
| PCB 156             | 0.00003 | 11.949 | 34 | 0.032 | 0.0004   | 15.937 | 47 | 0.05  | 5       | 17.971 | 39 | 0.071 | 0.0005   |
| PCB 157             | 0.00003 | 2.022  | 34 | 0.033 | 0.00006  | 2.549  | 46 | 0.053 | 8       | 2.954  | 39 | 0.073 | 0.00009  |
| PCB 169             | 0.03    | 0.062  | 28 | 0.032 | 0.002    | 0.108  | 26 | 0.036 | 3       | ND     | 25 | 0.035 | 0.0005   |
| PCB 189             | 0.049   | 0.779  | 34 | 0.028 | 0.00002  | 1.131  | 46 | 0.036 | 3       | 1.066  | 37 | 0.049 | 0.00003  |

ND = Not detectable

**Table S2.** Estimated daily intake (EDI) in pg TEQ/kg bw/day of dioxin-like polychlorinated biphenyls (DL-PCBs), polychlorinated dibenzodioxins (PCDD) and polychlorinated dibenzofurans (PCDF) and their sum (PCDD/F+PCB) by infants of different ages (months).

| City                          | Age <sup>1</sup> / EDI <sup>2</sup> | PCDD/F | PCB  | PCDD/F+P<br>CB | PCDD/F+PCB<br>(mean fat: 2.75%) |
|-------------------------------|-------------------------------------|--------|------|----------------|---------------------------------|
| <b>Arica</b><br>Fat: 2.09%    | 0 - 2 m                             | 18.31  | 4.07 | 22.38          | 29.45                           |
|                               | 3 - 4 m                             | 15.19  | 3.37 | 18.56          | 24.42                           |
|                               | 5 - 6 m                             | 13.76  | 3.06 | 16.81          | 22.12                           |
|                               | 7 - 12 m                            | 7.45   | 1.65 | 9.10           | 11.98                           |
|                               | 13 - 24 m                           | 5.49   | 1.22 | 6.71           | 8.83                            |
| <b>Coltauco</b><br>Fat: 3.59% | 0 - 2 m                             | 22.04  | 4.24 | 26.28          | 20.13                           |
|                               | 3 - 4 m                             | 18.28  | 3.51 | 21.79          | 16.69                           |
|                               | 5 - 6 m                             | 16.56  | 3.18 | 19.74          | 15.12                           |
|                               | 7 - 12 m                            | 8.97   | 1.72 | 10.69          | 8.19                            |
|                               | 13 - 24 m                           | 6.61   | 1.27 | 7.88           | 6.04                            |
| <b>Molina</b><br>Fat: 2.58%   | 0 - 2 m                             | 20.18  | 5.02 | 24.07          | 25.66                           |
|                               | 3 - 4 m                             | 16.73  | 4.17 | 20.90          | 22.28                           |
|                               | 5 - 6 m                             | 15.16  | 3.77 | 18.93          | 20.18                           |
|                               | 7 - 12 m                            | 8.21   | 2.04 | 10.25          | 10.92                           |
|                               | 13 - 24 m                           | 6.05   | 1.51 | 7.56           | 8.05                            |

<sup>1</sup> Age in months; <sup>2</sup>EDI in pg TEQ/kg bw/day

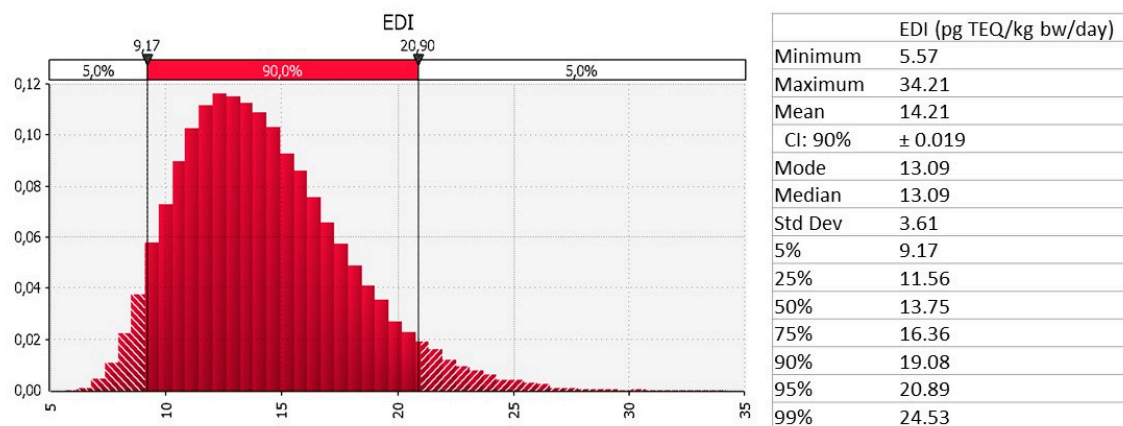

**Figure S1.** Estimated daily intake (EDI) in pg TEQ/kg bw/day of the sum of dioxin-like polychlorinated biphenyls (DL-PCBs), polychlorinated dibenzodioxins (PCDD) and polychlorinated dibenzofurans (PCDF) in Chilean infants by breast milk consumption.
